# Supplementary material
Source: PubMed Central journal article supplement (PMC282818)
Supplement: plntcell_15_12_2866__1.pdf [file plntcell_15_12_2866__1.pdf]

**Table 1.** Volatiles detected in headspace of flowering transgenic *Arabidopsis* plants (ecotype Columbia). Analysis of two flowering plants was performed using Tenax trapping / thermodesorption and subsequent analysis using GC-MS. n.d. not determined.

| Compound                             | Diurnal emission |
|--------------------------------------|------------------|
| <b>Monoterpenes</b>                  |                  |
| myrcene                              | yes              |
| $\alpha$ -phellandrene               | yes              |
| $\alpha$ -terpinene                  | yes              |
| limonene                             | yes              |
| ( <i>Z</i> )- $\beta$ -ocimene       | yes              |
| ( <i>E</i> )- $\beta$ -ocimene       | yes              |
| $\gamma$ -terpinene                  | yes              |
| terpinolene                          | yes              |
| linalool                             | yes              |
| allo-ocimene (isomer n.d.)           | yes              |
| allo-ocimene (isomer n.d.)           | yes              |
| $\alpha$ -terpineol                  | not clear        |
| nerol                                | yes              |
| geraniol                             | yes              |
| <b>Sesquiterpenes</b>                |                  |
| sesquiterpene ( $M^{+} = 204$ )      | yes              |
| $\beta$ -caryophyllene               | yes              |
| thujopsene                           | yes              |
| $\alpha$ -humulene                   | yes              |
| sesquiterpene ( $M^{+} = 204$ )      | yes              |
| sesquiterpene ( $M^{+} = 204$ )      | yes              |
| ( <i>E, E</i> )- $\alpha$ -farnesene | yes              |
| ( <i>E</i> )- $\beta$ -farnesene     | no               |
| $\beta$ -bisabolene                  | yes              |
| sesquiterpene ( $M^{+} = 204$ )      | yes              |
| sesquiterpene ( $M^{+} = 204$ )      | yes              |
| sesquiterpene ( $M^{+} = 204$ )      | yes              |
| sesquiterpene ( $M^{+} = 204$ )      | yes              |
| ( <i>E</i> )- nerolidol              | yes              |
| ( <i>Z</i> )- nerolidol              | yes              |
| <b>Others</b>                        |                  |
| nonanal                              | no               |
| decanal                              | no               |
| pentadecane (branched)               | not clear        |
| branched alkane                      | no               |
| ester                                | not clear        |
| branched alkane                      | no               |
